# Supplementary material for: Ground-dwelling arthropods of pinyon-juniper woodlands: Arthropod community patterns are driven by climate and overall plant productivity, not host tree species
Source: PLoS One. 2020 Aug 26;15(8):e0238219. doi: 10.1371/journal.pone.0238219 (PMC7449382; doi:10.1371/journal.pone.0238219)
Supplement: S3 Table — All analyses agreed. (XLSX) [file pone.0238219.s003.xlsx]

## Sheet: Sheet1
		PERMANOVA		ANOSIM		MRPP
Community	Category	F	p	R	p	A	p
Ants	Tree	1.31	0.212	0.013	0.226	0.004	0.237
	Gradient	5.11	<0.001	0.159	0.001	0.099	0.001
	Site	3.05	<0.001	0.282	0.001	0.046	0.001
	Date	3.36	<0.001	0.228	0.001	0.069	0.001
Beetles	Tree	1.03	0.389	0.002	0.383	0.001	0.472
	Gradient	3.71	0.002	0.099	0.002	0.023	0.001
	Site	2	<0.001	0.156	0.001	0.053	0.001
	Date	4.89	<0.001	0.311	0.001	0.105	0.001
